# Supplementary material for: Novel layered iron vanadate cathode for high-capacity aqueous rechargeable zinc batteries
Source: Royal Society of Chemistry journal article supplement (doi:10.1039/c8cc00987b), 2018-01-01
Supplement: c8cc00987b1.pdf [file c8cc00987b1.pdf]

## Electronic Supplementary Information

### Layered Iron Vanadate Cathode for High-Capacity Aqueous Rechargeable Zinc Battery

Zhuo Peng,<sup>a</sup> Qiulong Wei,<sup>b</sup> Shuangshuang Tan,<sup>a</sup> Pan He,<sup>a</sup> Wen Luo,<sup>a</sup> Qinyou An,<sup>a\*</sup> and Liqiang Mai<sup>a\*</sup>

<sup>a</sup> *State Key Laboratory of Advanced Technology for Materials Synthesis and Processing, International School of Materials Science and Engineering, Wuhan University of Technology, Wuhan 430070, Hubei, China.*

<sup>b</sup> *Department of Materials Science and Engineering, University of California Los Angeles, CA 90095-1595, USA.*

## Experimental

**Synthesis of FVO nanosheets.** The FVO nanosheets were synthesized via a simple water bath method. In a typical process, 3 mmol  $\text{NH}_4\text{VO}_3$  (Aladdin, 99%) was dissolved in 100 mL deionized water after water bath at 90 °C, and 1 mmol  $\text{Fe}(\text{NO}_3)_3 \cdot 9\text{H}_2\text{O}$  (Aladdin, 99.99%) was dissolved in 10 mL deionized water. Then the  $\text{Fe}(\text{NO}_3)_3 \cdot 9\text{H}_2\text{O}$  solution was added into the  $\text{NH}_4\text{VO}_3$  solution dropwise with water bath for 1 h. The precipitation was separated by centrifugation and washed by water and ethanol for three times. At last, it was dried in oven at 70 °C over night.

**Materials characterization.** *Ex-situ* XRD and *in-situ* XRD measurements were performed to investigate the crystallographic structure using a Bruker D8 Discover X-ray diffractometer with Cu K $\alpha$  radiation ( $\lambda = 1.5418 \text{ \AA}$ ). The IR was obtained by NEXUS 670 FTIR spectrometer. TG analysis and DSC were performed using NETZSCH-STA449c/3/G thermoanalyzer. The SEM images were collected by a JEOL-7100F microscope at an acceleration voltage of 20 kV. TEM, EDS element mapping and HRTEM images were recorded using a Titan G2 60–300 transmission electron microscope. The chemical states of elements were evaluated by XPS (VG MultiLab 2000).

**Electrochemical measurements.** The electrochemical properties were characterized by assembling 2016 coin cells in air, using zinc metal as anode and 0.3 M  $\text{Zn}(\text{TFSI})_2$  (zinc(II) bis(trifluoromethanesulfonyl) imide, Sigma-Aldrich, 95%) as electrolyte. The cathodes were prepared with mass ratio of 70% active material, 20% acetylene black, and 10% polytetrafluoroethylene (PTFE), whose loading density of active material is about 0.62 g  $\text{cm}^{-2}$ . Galvanostatic charge/discharge tests and GITT were performed over the potential range from 0.4 to 1.6 V vs.  $\text{Zn}/\text{Zn}^+$  using a multichannel battery testing system (LAND CT2001A). CV was conducted using an electrochemical workstation (CHI600E and Autolab PGSTAT 302N).

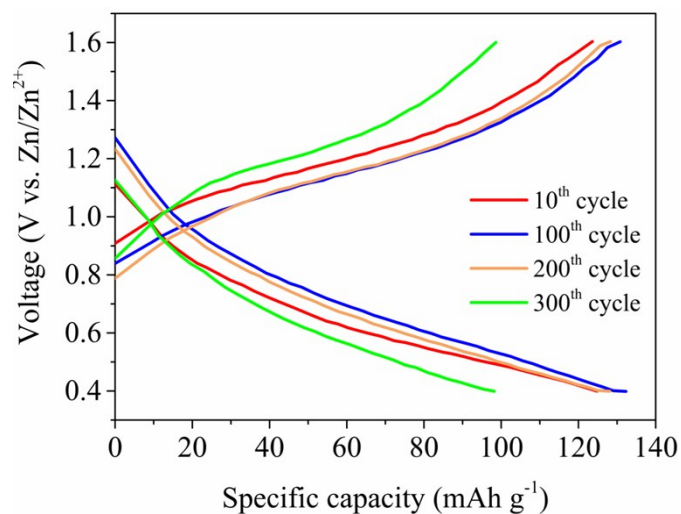

**Fig. S1** Charge and discharge curves of FVO in Zn(TFSI)<sub>2</sub> electrolyte at 5 A g<sup>-1</sup>.

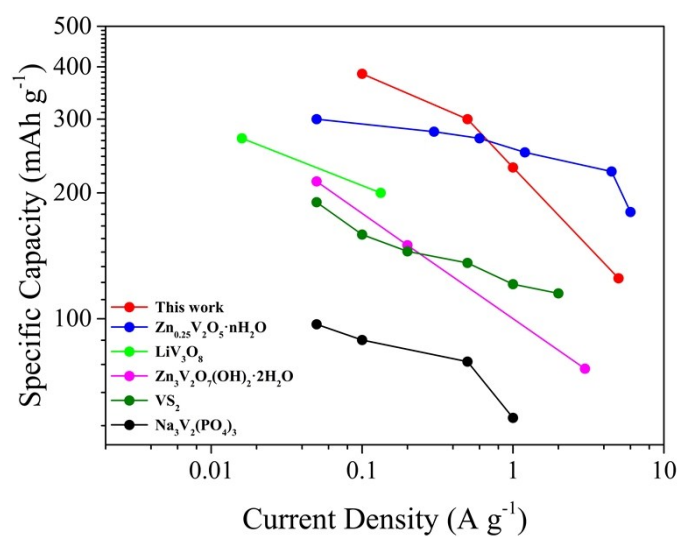

**Fig. S2** Comparison of Zn-ion storage capacity of layered FVO to the state-of-the-art reported vanadium based cathodes: Zn<sub>0.25</sub>V<sub>2</sub>O<sub>5</sub>·nH<sub>2</sub>O,<sup>1</sup> LiV<sub>3</sub>O<sub>8</sub>,<sup>2</sup> Zn<sub>3</sub>V<sub>2</sub>O<sub>7</sub>(OH)<sub>2</sub>·2H<sub>2</sub>O,<sup>3</sup> VS<sub>2</sub>,<sup>4</sup> Na<sub>3</sub>V<sub>2</sub>(PO<sub>4</sub>)<sub>3</sub>.<sup>5</sup> It can be clearly seen that FVO cathode in this work delivers relatively high specific capacity and could tolerate much higher current density.

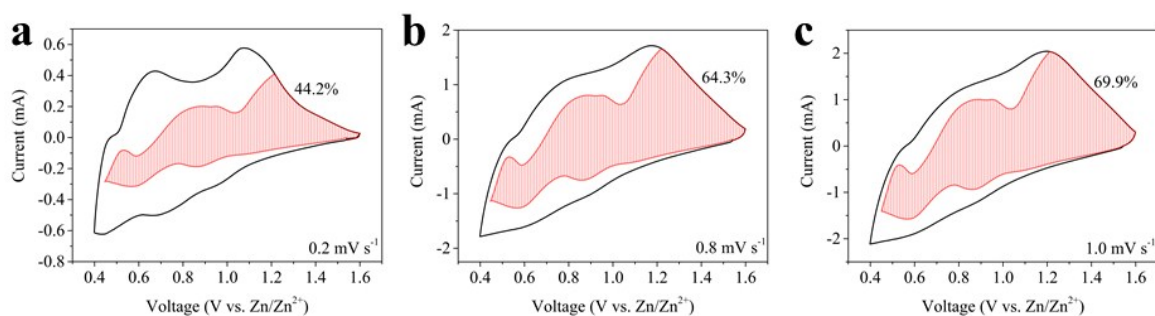

**Fig. S3** Capacity separation curves at 0.2, 0.8 and 1.0  $\text{mV s}^{-1}$ , calculated from data in Fig. 3a.

**GITT test.** Fig. S4 shows the GITT curves during the 4<sup>th</sup> cycle. The cell was discharged/charged at a constant current flux ( $0.2 \text{ A g}^{-1}$ ) with intervals of 10min. Two charge steps during the GITT experiment at around 0.9 V is shown in Fig. S5, with schematic labeling of different parameters. The values of chemical diffusion coefficients ( $D$ ) can be obtained via following equation<sup>6</sup>:

$$D = \frac{4}{\pi\tau} \left( \frac{m_B V_M}{M_B S} \right)^2 \left( \frac{\Delta E_S}{\Delta E_t} \right)^2$$

Where  $\tau$  is the pulse duration,  $M_B$  is the molar mass of FVO,  $V_M$  is the molar volume,  $m_B$  and  $S$  are the active mass and electrode/electrolyte contact area.  $\Delta E_S$  and  $\Delta E_t$  can be obtained from the GITT curves. The Zn ion diffusion coefficient (about  $10^{-11}$ - $10^{-10} \text{ cm}^2 \text{ s}^{-1}$ ) as a function of cell voltage are plotted in Fig. S6.

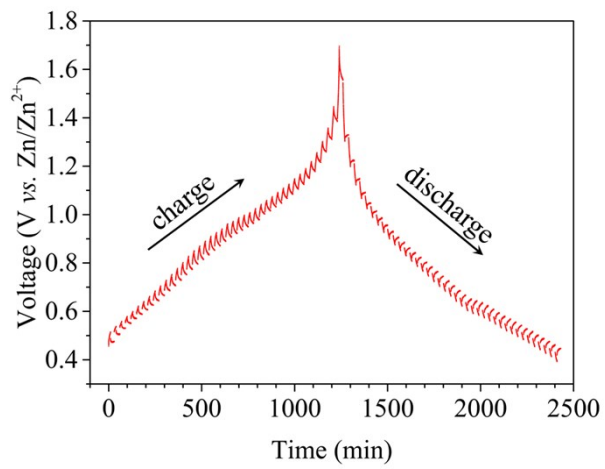

**Fig. S4** GITT curves of FVO/Zn system during the 4th cycle.

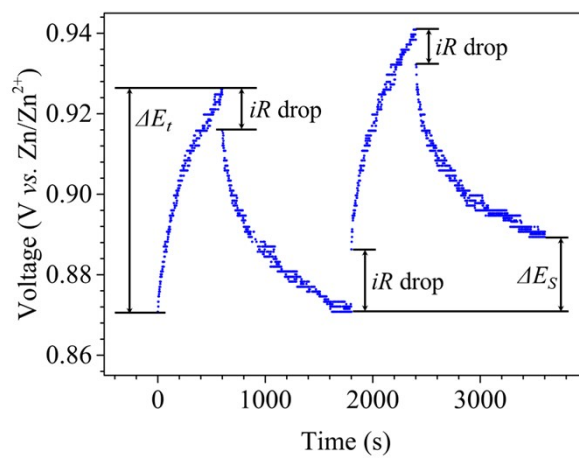

**Fig. S5** Scheme of two charge steps during the GITT experiment at around 0.9 V.

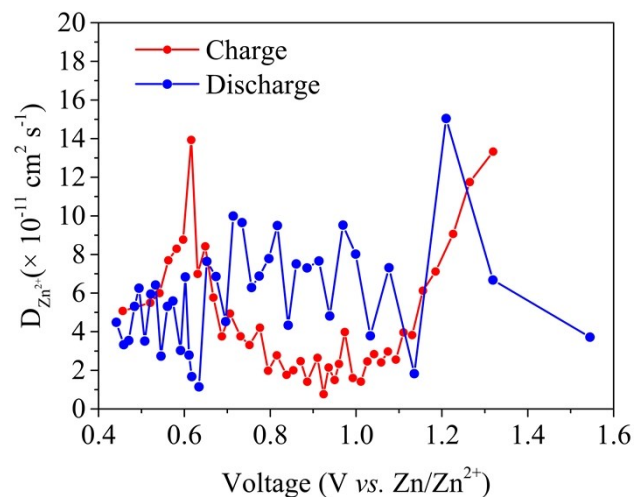

**Fig. S6** Diffusion coefficients of Zn ion calculated from GITT.

## References

1. D. Kundu, B. D. Adams, V. Duffort, S. H. Vajargah and L. F. Nazar, *Nature Energy*, 2016, **1**, 16119.
2. M. H. Alfaruqi, V. Mathew, J. Song, S. Kim, S. Islam, D. T. Pham, J. Jo, S. Kim, J. P. Baboo and Z. Xiu, *Chemistry of Materials*, 2017, **29**, 1684-1694.
3. C. Xia, J. Guo, Y. Lei, H. Liang, C. Zhao and H. N. Alshareef, *Advanced Materials*, 2017, 1705580.
4. P. He, M. Yan, G. Zhang, R. Sun, L. Chen, Q. An and L. Mai, *Advanced Energy Materials*, 2017, **7**, 1601920.
5. G. Li, Z. Yang, Y. Jiang, C. Jin, W. Huang, X. Ding and Y. Huang, *Nano Energy*, 2016, **25**, 211-217.
6. Y. Zhu, T. Gao, X. Fan, F. Han and C. Wang, *Accounts of Chemical Research*, 2017, **50**, 1022.
